# Supplementary material for: Ag nanoparticles-decorated ZnO nanorod array on a mechanical flexible substrate with enhanced optical and antimicrobial properties
Source: PubMed Central journal article supplement (PMC4385129; doi:10.1186/s11671-014-0712-3), 2015-03-01
Supplement: 11671_2014_712_MOESM1_ESM.pdf [file 11671_2014_712_MOESM1_ESM.pdf]

## Supplementary document

### Ag Nanoparticles-decorated ZnO Nanorod Array on A Mechanical Flexible Substrate with Enhanced Optical and Anti-microbial Properties

*Yi Chen, Wai Hei Tse, Longyan Chen, and Jin Zhang \**

Department of Chemical & Biochemical Engineering, University of Western Ontario, London, Ontario, Canada, N6A 5B9  
E-mail: jzhang@eng.uwo.ca

S1. Ag NPs with  $20\pm 5$  nm in diameter deposited on PDMS through a photo-reduction process .

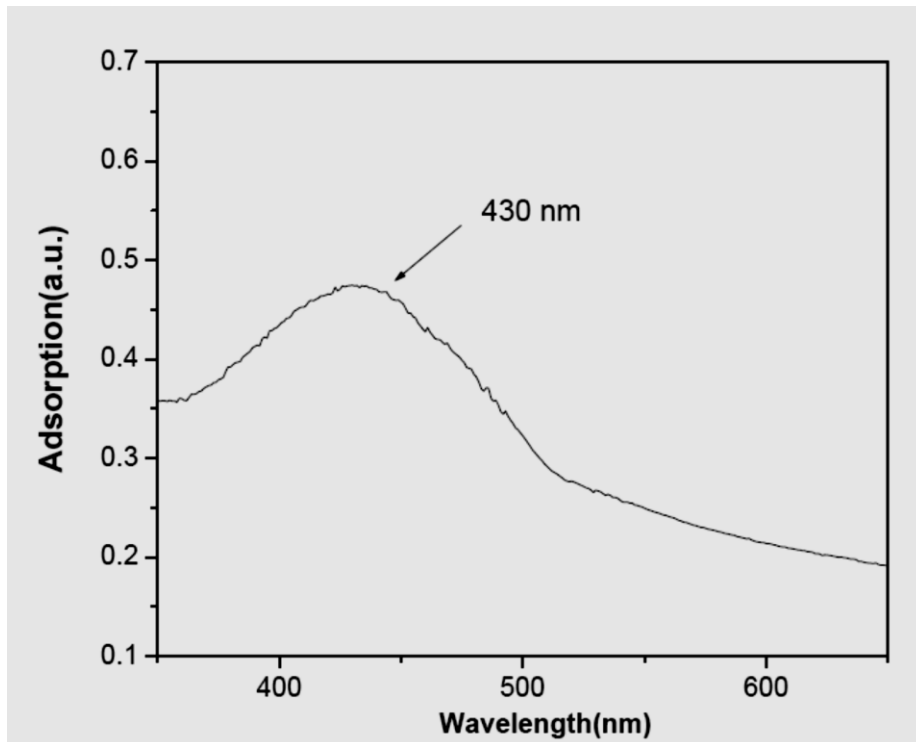

Figure S1. UV-vis absorption of Ag NPs with 22 nm in diameter deposited on PDMS through a photo-reduction process.
